# Supplementary material for: Reactions of cationic transition metal acetonitrile complexes [M(CH3CN)n]m+ with GaCp*: novel gallium complexes of iron, cobalt, copper and silver
Source: Royal Society of Chemistry journal article supplement (doi:10.1039/b815319a), 2009-01-01
Supplement: b815319a.pdf [file b815319a.pdf]

**Reactions of Cationic Transition Metal Acetonitrile Complexes  
[M(CH<sub>3</sub>CN)<sub>n</sub>]<sup>m+</sup> with GaCp\*: Novel Gallium Complexes of Iron,  
Cobalt, Copper and Silver.**

**Timo Bollermann, Arik Puls, Christian Gemel, Thomas Cadenbach and Roland A. Fischer\***

*Anorganische Chemie II, Organometallics and Materials Chemistry, Ruhr University Bochum,  
Universitätsstraße 150, 44780 Bochum, Germany*

**Supporting Information**

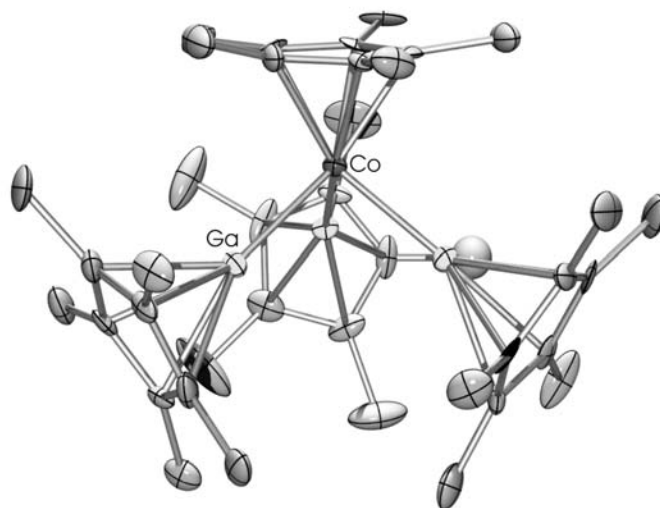

**Fig. 1** Molecular structure of the cationic part  $[\text{Cp}^*\text{Co}(\text{GaCp}^*)_3]^{2+}$  (**2**) as determined by single crystal X-ray crystallography (thermal ellipsoids are shown at the 30% probability level, hydrogen atoms have been omitted for clarity). Selected bond lengths ( $\text{\AA}$ ) and angles ( $^\circ$ ): Co(1)-Ga(1) 2.3168(16), Co(1)-Ga(2) 2.2798(13), Co(1)-Ga(3) 2.2935(13), Co(1)-Cp\*<sub>centroid</sub> 1.698, Ga(1)-Cp\*<sub>centroid</sub> 1.907, Ga(2)-Cp\*<sub>centroid</sub> 1.872, Ga(3)-Cp\*<sub>centroid</sub> 1.900, Ga(1)-Co(1)-Cp\*<sub>centroid</sub> 123.78, Ga(3)-Co(1)-Cp\*<sub>centroid</sub> 123.33, Co(1)-Ga(1)-Cp\*<sub>centroid</sub> 172.71, Co(1)-Ga(3)-Cp\*<sub>centroid</sub> 172.50, Ga(1)-Co(1)-Ga(3) 93.11(5), Ga(2)-Co(1)-Ga(3) 91.48(5).

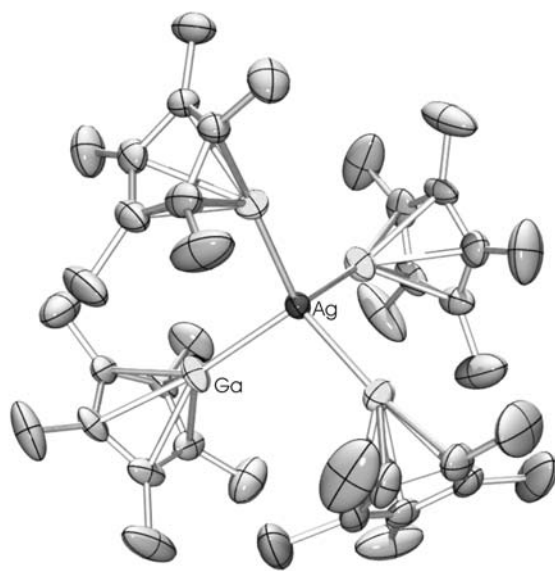

**Fig. 2** Molecular structure of the cationic part  $[\text{Ag}(\text{GaCp}^*)_4]^+$  (**5**) as determined by single crystal X-ray crystallography (thermal ellipsoids are shown at the 30% probability level, hydrogen atoms have been omitted for clarity). Selected bond lengths ( $\text{\AA}$ ) and angles ( $^\circ$ ): Ag(1)-Ga(1) 2.5153(5), Ag(1)-Ga(2) 2.5279(5), Ag(1)-Ga(3) 2.5232(6), Ag(1)-Ga(4) 2.5114(5), Ga(1)-Cp\*<sub>centroid</sub> 1.932, Ga(2)-Cp\*<sub>centroid</sub> 1.946, Ga(3)-Cp\*<sub>centroid</sub> 1.953, Ga(4)-Cp\*<sub>centroid</sub> 1.942, Ga(1)-Ag(1)-Ga(2) 109.08(2), Ag(1)-Ga(3)-Cp\*<sub>centroid</sub> 158.29.

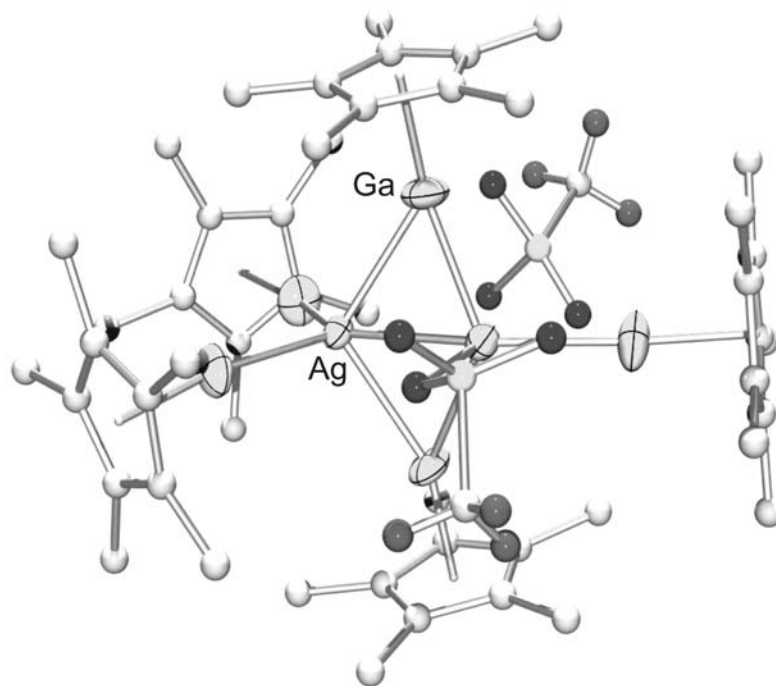

**Fig. 3** Molecular structure of  $[\text{Ag}_2(\text{GaCp}^*)_5][\text{CF}_3\text{SO}_3]_2$  (**6**) as determined by single crystal X-ray crystallography (thermal ellipsoids are shown at the 30% probability level, hydrogen atoms have been omitted for clarity).
